# Supplementary material for: FeP2 monolayer: isoelectronic analogue of MoS2 with excellent electronic and optical properties
Source: Royal Society of Chemistry journal article supplement (doi:10.1039/d2cp01057g), 2022-01-01
Supplement: d2cp01057g1.pdf [file d2cp01057g1.pdf]

## Supporting Information

### **FeP<sub>2</sub> monolayer: Isoelectronic analogue of MoS<sub>2</sub> with excellent electronic and optical properties**

By

Chen Yan<sup>1</sup>, Jiuqi Yi<sup>1</sup>, Dan Li<sup>1\*</sup>, Chang Xu<sup>1</sup>, and Longjiu Cheng<sup>1,2\*</sup>

<sup>1</sup>*Department of Chemistry, Key Laboratory of Functional Inorganic Materials of Anhui Province, Anhui University, Hefei, 230601, PR China*

<sup>2</sup>*Key Laboratory of Structure and Functional Regulation of Hybrid Materials (Anhui University), Ministry of Education, Hefei, 230601, PR China*

\*Corresponding authors email: [clj@ustc.edu\(L.C.\)](mailto:clj@ustc.edu(L.C.)); [ahulidan@aliyun.com\(D.L.\)](mailto:ahulidan@aliyun.com(D.L.))

| <b>Index</b>                                                                           | <b>Page</b> |
|----------------------------------------------------------------------------------------|-------------|
| <b>1. O<sub>2</sub> adsorption sites on the FeP<sub>2</sub> monolayer .....</b>        | <b>2</b>    |
| <b>2. The oxidation resistance of the FeP<sub>2</sub> monolayer .....</b>              | <b>3</b>    |
| <b>3. The band structure of K on the FeP<sub>2</sub> monolayer.....</b>                | <b>4</b>    |
| <b>4. The open circuit voltage profiles of K on the FeP<sub>2</sub> monolayer.....</b> | <b>5</b>    |
| <b>5. Thermal stability of the FeP<sub>2</sub> monolayer .....</b>                     | <b>6</b>    |
| <b>6. Adsorption Energies on the FeP<sub>2</sub> monolayer .....</b>                   | <b>7</b>    |
| <b>7. Structural information of the FeP<sub>2</sub> monolayer.....</b>                 | <b>7</b>    |

## 1. O<sub>2</sub> adsorption sites on the FeP<sub>2</sub> monolayer

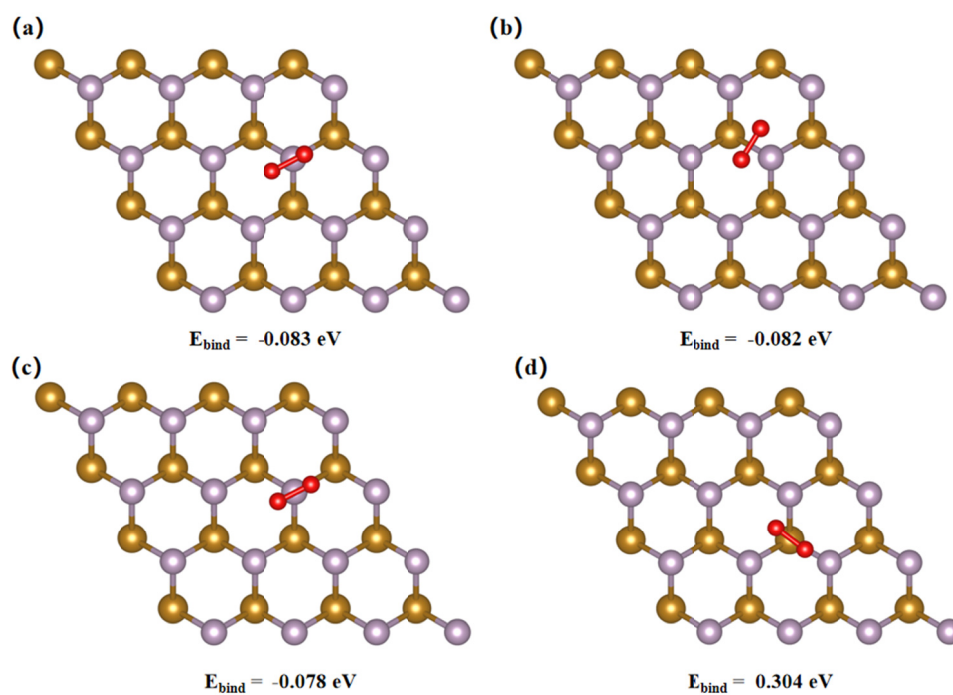

**Fig. S1.** Top view of several other adsorption sites for O<sub>2</sub> and the corresponding adsorption energies.

## 2. The oxidation resistance of the FeP<sub>2</sub> monolayer

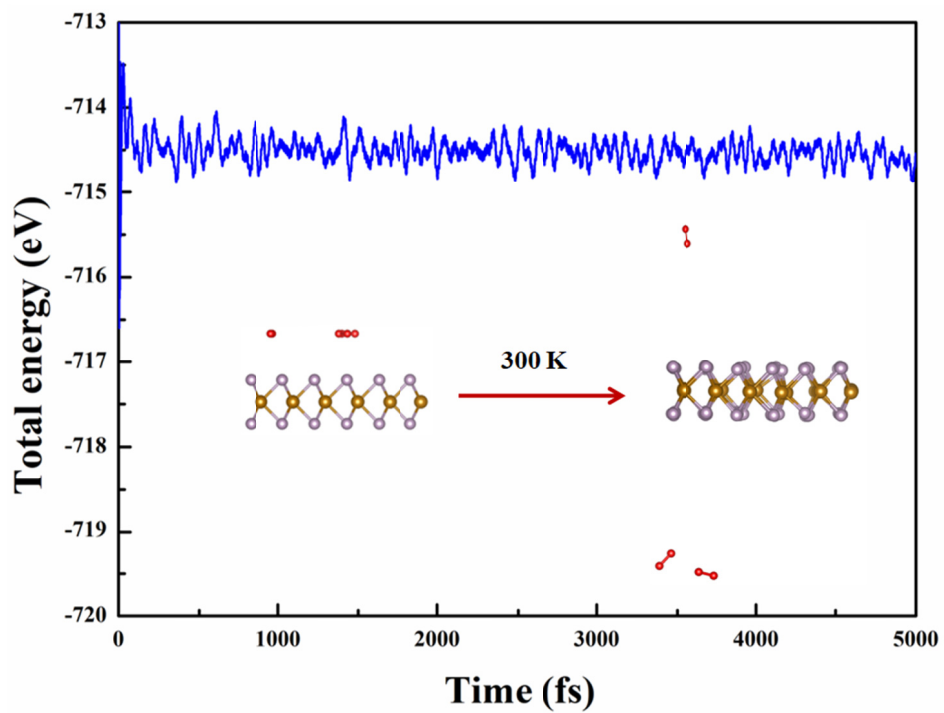

**Fig. S2.** Total energy and a snapshot of the FeP<sub>2</sub> monolayer with 3 O<sub>2</sub> molecules after a AIMD simulation of 5 ps at 300 K.

### 3. The band structure of K on the FeP<sub>2</sub> monolayer

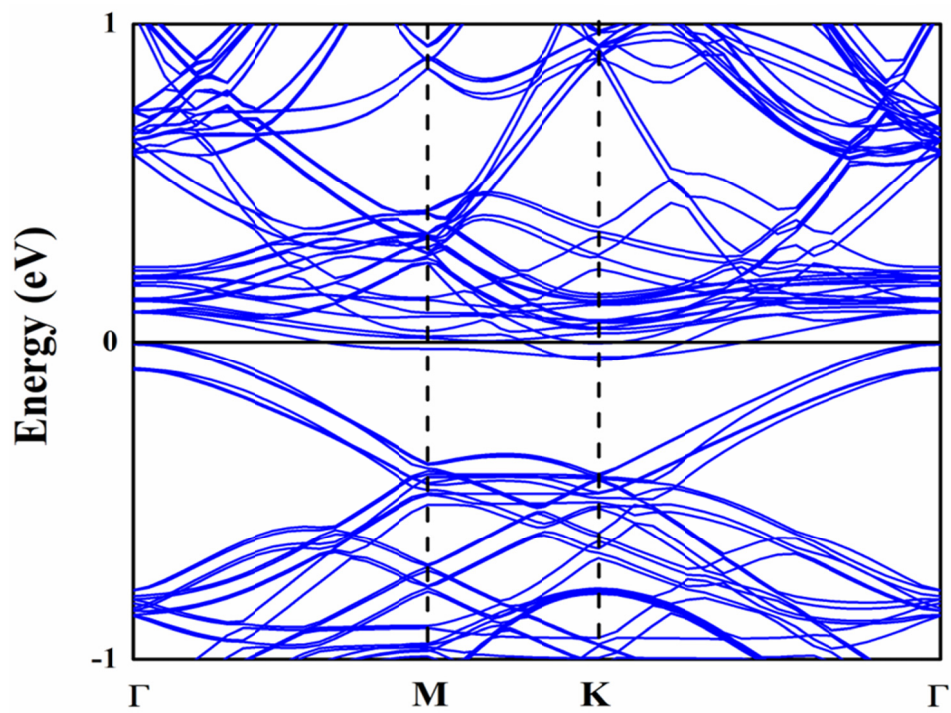

**Fig. S3.** Calculated band structure of 2D Fe<sub>16</sub>P<sub>32</sub>K from PBE method.

4. The open circuit voltage profiles of K on the FeP<sub>2</sub> monolayer

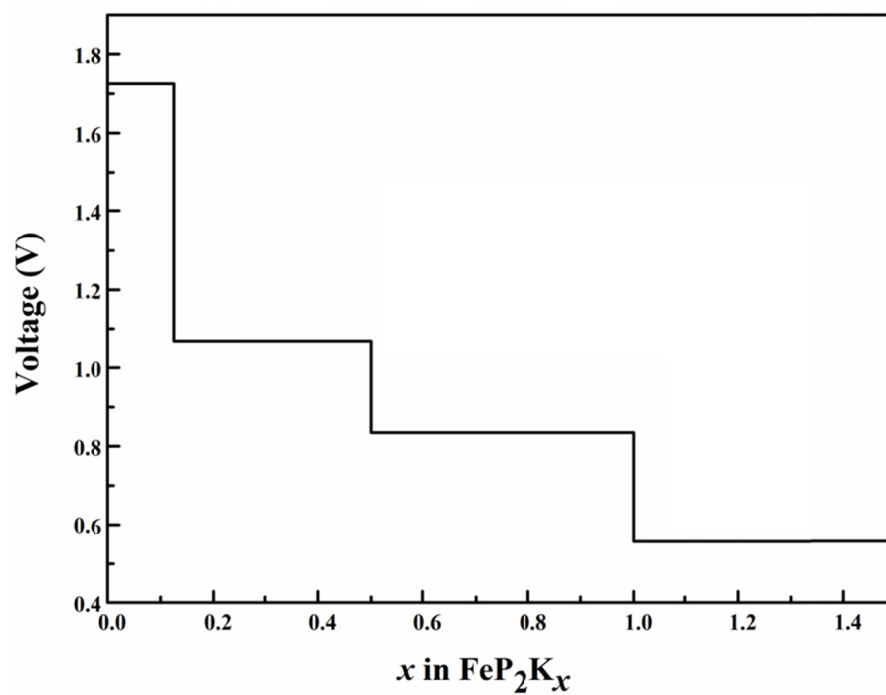

**Fig. S4.** Average voltages of different K concentrations in FeP<sub>2</sub>K<sub>x</sub>.

## 5. Thermal stability of the FeP<sub>2</sub> monolayer

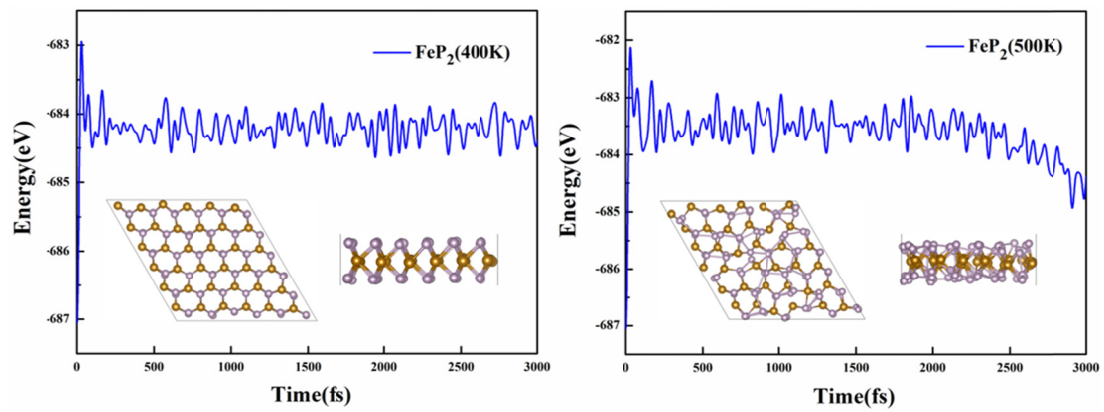

**Fig. S5.** AIMD simulation of the FeP<sub>2</sub> monolayer at 400 and 500 K, variation of energy fluctuation with time step and the snapshot of the FeP<sub>2</sub> monolayer.

## 6. Adsorption Energies on the FeP<sub>2</sub> monolayer

**Table S1.** Adsorption energies of various sites for K on the FeP<sub>2</sub> monolayer.

| Site                 | A <sub>1</sub> | A <sub>2</sub> | A <sub>3</sub> | A <sub>4</sub> | A <sub>5</sub> |
|----------------------|----------------|----------------|----------------|----------------|----------------|
| E <sub>ad</sub> (eV) | -1.78          | -1.61          | -1.76          | A <sub>1</sub> | A <sub>1</sub> |

## 7. Structural information of the FeP<sub>2</sub> monolayer

**Table S2.** Structural information of the predicted FeP<sub>2</sub> monolayer.

| Lattice parameters( Å, ° ) | Wyckoff position, fractional coordinates |          |          |          |
|----------------------------|------------------------------------------|----------|----------|----------|
|                            |                                          | <i>x</i> | <i>y</i> | <i>z</i> |
| <i>a</i> = <i>b</i> = 2.78 | Fe                                       | 0.33333  | 0.66667  | 0.50000  |
| <i>c</i> = 30              | P                                        | 0.66667  | 0.33333  | 0.55453  |
| <i>α</i> = <i>β</i> = 90   | P                                        | 0.66667  | 0.33333  | 0.44547  |
| <i>γ</i> = 120             |                                          |          |          |          |

## CONCAR

FeP<sub>2</sub>

```

1.0000000000000000
  2.7799852124312334  0.0000000000000000  0.0000000000000000
 -1.3899926062156167  2.4075378160654597  0.0000000000000000
  0.0000000000000000  0.0000000000000000  30.0000000000000000

```

Fe P

1 2

Direct

```

0.3333333429999996  0.6666666870000029  0.5000000000000000
0.6666666870000029  0.3333333429999996  0.5545296792859190
0.6666666870000029  0.3333333429999996  0.4454703207140810

```
